# Supplementary material for: Health Care Experiences and Perceived Financial Impact Among Families of Children With an Autism Spectrum Disorder
Source: Atypon-hosted journal article supplement (doi:10.1176/appi.ps.201200552), 2014-03-01
Supplement: 395_ds001.pdf [file 395_ds001.pdf]

Table 1

*Demographic characteristics of sample*

|                                                | ASD<br>(n=3,005) | ADHD only<br>(n=9,662) | IDD only<br>(n=949) | $\chi^2$ or <i>F</i><br>value |
|------------------------------------------------|------------------|------------------------|---------------------|-------------------------------|
| <b>Child characteristics</b>                   |                  |                        |                     |                               |
| Age (M±SE)                                     | 9.9±0.1          | 11.6±0.1               | 10.7±0.2            | 84.79***                      |
| Male (%)                                       | 80.5             | 68.2                   | 57.7                | 260.86***                     |
| Caucasian (%)                                  | 71.2             | 73.3                   | 64.2                | 37.84*                        |
| Hispanic (%)                                   | 15.5             | 12.9                   | 24.9                | 108.37***                     |
| <b>Family characteristics</b>                  |                  |                        |                     |                               |
| Below 100% federal poverty level household (%) | 18.4             | 24.7                   | 24.0                | 49.76***                      |
| Two biological/adoptive parent household (%)   | 61.8             | 44.3                   | 58.7                | 313.18***                     |
| College or higher educated household (%)       | 76.2             | 65.0                   | 62.2                | 142.87***                     |
| One child household (%)                        | 24.8             | 27.9                   | 22.5                | 21.72*                        |

Notes ASD = Autism spectrum disorder, ADHD = Attention deficit hyperactivity disorder, IDD = intellectual disability disorder

\*  $p < .05$ , \*\*\*  $p < .001$

Table 2. Factor score differences between groups

| Factor                        | ASD<br>(n=3,005) |     | ADHD only<br>(n=9,662) |     | IDD only<br>(n=949) |     | <i>F</i> value | Post-hoc             |
|-------------------------------|------------------|-----|------------------------|-----|---------------------|-----|----------------|----------------------|
|                               | M                | SE  | M                      | SE  | M                   | SE  |                |                      |
| Doctor satisfaction           | -.05             | .03 | .37                    | .02 | .08                 | .11 | 63.67***       | ASD<ADHD<br>IDD<ADHD |
| Timeliness of care            | -.08             | .04 | .71                    | .02 | .08                 | .11 | 187.19***      | ASD<ADHD<br>IDD<ADHD |
| Insurance coverage            | -.05             | .03 | .49                    | .02 | .30                 | .13 | 113.77***      | ASD<ADHD<br>ASD<IDD  |
| Impact on financial situation | .03              | .02 | -.62                   | .01 | -.06                | .06 | 285.30***      | ASD<ADHD<br>IDD<ADHD |

Notes. ASD = Autism spectrum disorder, ADHD = Attention deficit hyperactivity disorder, IDD = intellectual disability disorder

\*\*\*  $p < .001$
